# Supplementary material for: Student Perspectives of Extended Clinical Placements in Optometry: A Qualitative Study
Source: Research Square preprint supplement (doi:10.21203/rs.3.rs-129442/v1), 2020-12-31
Supplement: Supplementary file 1 [file 35f94c0f996910bf6666f9ec.docx]

Appendices 1

**STUDENT PERSPECTIVES OF EXTENDED CLINICAL PLACEMENTS IN OPTOMETRY: A QUALITATIVE STUDY**

Authors

Jacqueline M Kirkman, MOptom, BVisSci1

Sharon A Bentley, PhD, MOptom, MPH, BScOptom FACO, FAAO2

James A Armitage, PhD, MOptom, BSc (Optom) FACO, FAAO1

Craig A Woods, PhD, BSc (Hons) FACO, FAAO3

1Deakin Optometry, School of Medicine, Deakin University, Waurn Ponds, Australia

2School of Optometry and Vision Science, Queensland University of Technology, Kelvin Grove, Australia

3School of Optometry and Vision Sciences, University of New South Wales, Sydney, Australia

Corresponding author: Jacqueline Kirkman [jac.kirkman@deakin.edu.au](mailto:jac.kirkman@deakin.edu.au)

**Appendices 1**

**Semi-structured interview guide for focus groups**

How was your extended placement experience?

- What were the positive/negatives of the experience?
- Was it what you thought it would be?
- Did you feel prepared for it?
- How do you think it could have been improved?
  - Reasonable teaching alterations/suggestions?
- How did you rural placement differ from your urban placement?
- Did the placement influence where you wish to work after graduation?

How important is it that students are exposed to rural optometry through placements?

- How do you feel about compulsory rural placements?
- How long do you think rural placements should be and why?
  - What benefits do you see to a short placement (I.e.; 1 to 7 day placements)
  - What benefits do you see to an extended placement (I.e.; 2 to 6 month placements)
  - What differences do you think there are between a short and extended placement?
- Where, in terms of location, did you complete your extended placement and what are the reasons for this?
  - How did you choose to structure your extended placement? (I.e.; did you complete the full 6 months in one practice location or split it into different locations?)
    - What benefits/negatives did you see to this?
- Do you think a placement could altered your future practice intentions?

How interested in working in rural areas are optometry graduates? Elaborate.

- What reasons make students more or less likely to work rurally?
- What incentives would increase student interest in working in rural areas?
- How do you feel about living in a rural area?
- How do you feel about working in a rural area?
- In what way has where you have grown up influenced your future practice intentions?
